# Supplementary material for: Health Promoting Schools in Germany. Mapping the Implementation of Holistic Strategies to Tackle NCDs and Promote Health
Source: MDPI journal article supplement (doi:10.3390/ijerph18052623), 2021-03-05
Supplement: s1 [file s1]

**Table S1.** Instruments used for this survey.

|                                                                                                                                                                                  |                                       |                                       |                                       |                                       |                                       |
|----------------------------------------------------------------------------------------------------------------------------------------------------------------------------------|---------------------------------------|---------------------------------------|---------------------------------------|---------------------------------------|---------------------------------------|
| <b>In the following, we ask you to make statements about your work as a school principal.</b><br>Please check the answer that most closely matches your perception.              |                                       |                                       |                                       |                                       |                                       |
|                                                                                                                                                                                  | Not true                              |                                       |                                       |                                       | Completely true                       |
| I have access to the resources I need to do my job well.                                                                                                                         | <input type="checkbox"/> <sub>1</sub> | <input type="checkbox"/> <sub>2</sub> | <input type="checkbox"/> <sub>3</sub> | <input type="checkbox"/> <sub>4</sub> | <input type="checkbox"/> <sub>5</sub> |
| I can obtain the resources necessary to support new ideas                                                                                                                        | <input type="checkbox"/> <sub>1</sub> | <input type="checkbox"/> <sub>2</sub> | <input type="checkbox"/> <sub>3</sub> | <input type="checkbox"/> <sub>4</sub> | <input type="checkbox"/> <sub>5</sub> |
| When I need additional resources to do my job, I can usually get them                                                                                                            | <input type="checkbox"/> <sub>1</sub> | <input type="checkbox"/> <sub>2</sub> | <input type="checkbox"/> <sub>3</sub> | <input type="checkbox"/> <sub>4</sub> | <input type="checkbox"/> <sub>5</sub> |
| <b>In the following, we ask you to make statements about your work as a school principal.</b><br>Please check the answer that most closely matches your perception.              |                                       |                                       |                                       |                                       |                                       |
|                                                                                                                                                                                  | Not true at all                       |                                       |                                       |                                       | Completely true                       |
| Overall, the work offers many opportunities to make own decisions                                                                                                                | <input type="checkbox"/> <sub>1</sub> | <input type="checkbox"/> <sub>2</sub> | <input type="checkbox"/> <sub>3</sub> | <input type="checkbox"/> <sub>4</sub> | <input type="checkbox"/> <sub>5</sub> |
| I can decide for myself the way in which I do my work                                                                                                                            | <input type="checkbox"/> <sub>1</sub> | <input type="checkbox"/> <sub>2</sub> | <input type="checkbox"/> <sub>3</sub> | <input type="checkbox"/> <sub>4</sub> | <input type="checkbox"/> <sub>5</sub> |
| I can plan my work autonomously (e.g. decide myself which material I need)                                                                                                       | <input type="checkbox"/> <sub>1</sub> | <input type="checkbox"/> <sub>2</sub> | <input type="checkbox"/> <sub>3</sub> | <input type="checkbox"/> <sub>4</sub> | <input type="checkbox"/> <sub>5</sub> |
| The implementation of my own ideas is difficult by the way my colleagues work                                                                                                    | <input type="checkbox"/> <sub>1</sub> | <input type="checkbox"/> <sub>2</sub> | <input type="checkbox"/> <sub>3</sub> | <input type="checkbox"/> <sub>4</sub> | <input type="checkbox"/> <sub>5</sub> |
| <b>If health promotion and prevention activities were continuously implemented at my school, I believe it would have a positive impact on students' academic performance</b>     |                                       |                                       |                                       |                                       |                                       |
| <input type="checkbox"/> <sub>1</sub>                                                                                                                                            | Very unlikely                         |                                       |                                       |                                       |                                       |
| <input type="checkbox"/> <sub>2</sub>                                                                                                                                            | Unlikely                              |                                       |                                       |                                       |                                       |
| <input type="checkbox"/> <sub>3</sub>                                                                                                                                            | Likely                                |                                       |                                       |                                       |                                       |
| <input type="checkbox"/> <sub>4</sub>                                                                                                                                            | Very likely                           |                                       |                                       |                                       |                                       |
| <b>In this section, we would like to know to what extent health currently plays a role at your school.</b><br>Please check the answer that most closely matches your perception. |                                       |                                       |                                       |                                       |                                       |
|                                                                                                                                                                                  | Strongly disagree                     | Rather Disagree                       | Rather Agree                          | Strongly agree                        |                                       |
| Health promotion is a topic in our school development group.                                                                                                                     | <input type="checkbox"/> <sub>1</sub> | <input type="checkbox"/> <sub>2</sub> | <input type="checkbox"/> <sub>3</sub> | <input type="checkbox"/> <sub>4</sub> |                                       |
| Health promotion and health goals are anchored in the mission statement and programme of our school.                                                                             | <input type="checkbox"/> <sub>1</sub> | <input type="checkbox"/> <sub>2</sub> | <input type="checkbox"/> <sub>3</sub> | <input type="checkbox"/> <sub>4</sub> |                                       |
| At our school, health plays an important role in the organisation of lessons.                                                                                                    | <input type="checkbox"/> <sub>1</sub> | <input type="checkbox"/> <sub>2</sub> | <input type="checkbox"/> <sub>3</sub> | <input type="checkbox"/> <sub>4</sub> |                                       |
| At our school, maintaining and promoting the health of all members plays an important role                                                                                       | <input type="checkbox"/> <sub>1</sub> | <input type="checkbox"/> <sub>2</sub> | <input type="checkbox"/> <sub>3</sub> | <input type="checkbox"/> <sub>4</sub> |                                       |
| Health-promoting aspects play an important role in the creation of working and learning conditions at our school.                                                                | <input type="checkbox"/> <sub>1</sub> | <input type="checkbox"/> <sub>2</sub> | <input type="checkbox"/> <sub>3</sub> | <input type="checkbox"/> <sub>4</sub> |                                       |

|                                                                                                                                                     |                                       |                                       |                                       |                                       |
|-----------------------------------------------------------------------------------------------------------------------------------------------------|---------------------------------------|---------------------------------------|---------------------------------------|---------------------------------------|
| At our school, pupils are supported in the development of health-promoting behaviours.                                                              | <input type="checkbox"/> <sub>1</sub> | <input type="checkbox"/> <sub>2</sub> | <input type="checkbox"/> <sub>3</sub> | <input type="checkbox"/> <sub>4</sub> |
| At our school, teachers are supported to deal with stressful situations more effectively.                                                           | <input type="checkbox"/> <sub>1</sub> | <input type="checkbox"/> <sub>2</sub> | <input type="checkbox"/> <sub>3</sub> | <input type="checkbox"/> <sub>4</sub> |
| Our school collaborates with external institutions in in the implementation of health-promoting activities                                          | <input type="checkbox"/> <sub>1</sub> | <input type="checkbox"/> <sub>2</sub> | <input type="checkbox"/> <sub>3</sub> | <input type="checkbox"/> <sub>4</sub> |
| At our school, systematic efforts are made to improve the work situation                                                                            | <input type="checkbox"/> <sub>1</sub> | <input type="checkbox"/> <sub>2</sub> | <input type="checkbox"/> <sub>3</sub> | <input type="checkbox"/> <sub>4</sub> |
| Our school continuously participates in projects/programs of health promotion/prevention                                                            | <input type="checkbox"/> <sub>1</sub> | <input type="checkbox"/> <sub>2</sub> | <input type="checkbox"/> <sub>3</sub> | <input type="checkbox"/> <sub>4</sub> |
| At our school, teachers are made aware of health-related topics such as exercise or self-management.                                                | <input type="checkbox"/> <sub>1</sub> | <input type="checkbox"/> <sub>2</sub> | <input type="checkbox"/> <sub>3</sub> | <input type="checkbox"/> <sub>4</sub> |
| Further training on health-related topics take place regularly at our school.                                                                       | <input type="checkbox"/> <sub>1</sub> | <input type="checkbox"/> <sub>2</sub> | <input type="checkbox"/> <sub>3</sub> | <input type="checkbox"/> <sub>4</sub> |
| At our school, we work closely with parents when it comes to the healthy development of children.                                                   | <input type="checkbox"/> <sub>1</sub> | <input type="checkbox"/> <sub>2</sub> | <input type="checkbox"/> <sub>3</sub> | <input type="checkbox"/> <sub>4</sub> |
| Health-promoting aspects are taken into account in the design of the school building and outdoor facilities (e.g., space for exercise, relaxation). | <input type="checkbox"/> <sub>1</sub> | <input type="checkbox"/> <sub>2</sub> | <input type="checkbox"/> <sub>3</sub> | <input type="checkbox"/> <sub>4</sub> |

**Table S2.** Pearson correlation, mean and standard deviation of HPS implementation (all items).

|                                                                           | M (SD)    | 1      | 2      | 3      | 4      | 5      | 6      | 7      | 8      | 9      | 10     | 11     | 12     | 13     |
|---------------------------------------------------------------------------|-----------|--------|--------|--------|--------|--------|--------|--------|--------|--------|--------|--------|--------|--------|
| 1 Health promotion as a topic in school development groups                | 2.9 (0.9) | 1      |        |        |        |        |        |        |        |        |        |        |        |        |
| 2 Health goals in the school's mission statement                          | 2.7 (1.0) | 0.58 * | 1      |        |        |        |        |        |        |        |        |        |        |        |
| 3 Health as a principle in the organisation of teaching                   | 2.8 (0.8) | 0.46 * | 0.54 * | 1      |        |        |        |        |        |        |        |        |        |        |
| 4 Importance of health promotion for all members in the school            | 2.9 (0.7) | 0.49 * | 0.48 * | 0.68 * | 1      |        |        |        |        |        |        |        |        |        |
| 5 Creation of health promoting working and learning conditions            | 2.8 (0.7) | 0.44 * | 0.45 * | 0.63 * | 0.71 * | 1      |        |        |        |        |        |        |        |        |
| 6 Promotion of healthy behaviours in students                             | 3.1 (0.7) | 0.34 * | 0.41 * | 0.58 * | 0.54 * | 0.55 * | 1      |        |        |        |        |        |        |        |
| 7 Support for teachers in dealing with stressful situations               | 2.8 (0.8) | 0.39 * | 0.33 * | 0.46 * | 0.53 * | 0.52 * | 0.46   | 1      |        |        |        |        |        |        |
| 8 Collaboration with external stakeholders                                | 2.4 (1.0) | 0.46 * | 0.45 * | 0.43 * | 0.42 * | 0.42 * | 0.39 * | 0.41 * | 1      |        |        |        |        |        |
| 9 Systematic improvement of the work situation                            | 2.7 (0.8) | 0.37 * | 0.31 * | 0.38 * | 0.43 * | 0.45 * | 0.35 * | 0.48 * | 0.41 * | 1      |        |        |        |        |
| 10 School participation in health promoting projects                      | 2.3 (1.1) | 0.32 * | 0.38 * | 0.34 * | 0.30 * | 0.29 * | 0.32 * | 0.22 * | 0.46 * | 0.27 * | 1      |        |        |        |
| 11 Awareness raising of health issues among teachers                      | 2.6 (0.9) | 0.48 * | 0.44 * | 0.46 * | 0.46 * | 0.45 * | 0.42 * | 0.51 * | 0.49 * | 0.44 * | 0.40 * | 1      |        |        |
| 12 Provision of regular further training on health-related topics         | 2.2 (0.8) | 0.48 * | 0.46 * | 0.43 * | 0.42 * | 0.41 * | 0.35 * | 0.44 * | 0.55 * | 0.41 * | 0.40 * | 0.62 * | 1      |        |
| 13 Close cooperation with parents for the healthy development of children | 2.8 (0.9) | 0.22 * | 0.24 * | 0.38 * | 0.35 * | 0.39 * | 0.46 * | 0.33 * | 0.24 * | 0.27 * | 0.26 * | 0.31 * | 0.25 * | 1      |
| 14 Creation of health-promoting school environment                        | 2.7 (1.0) | 0.22 * | 0.26 * | 0.33 * | 0.33 * | 0.41 * | 0.35 * | 0.30 * | 0.25 * | 0.29 * | 0.22 * | 0.30 * | 0.27 * | 0.35 * |

Notes. *M* mean value, *SD* standard deviation, \*  $p < 0.001$ .

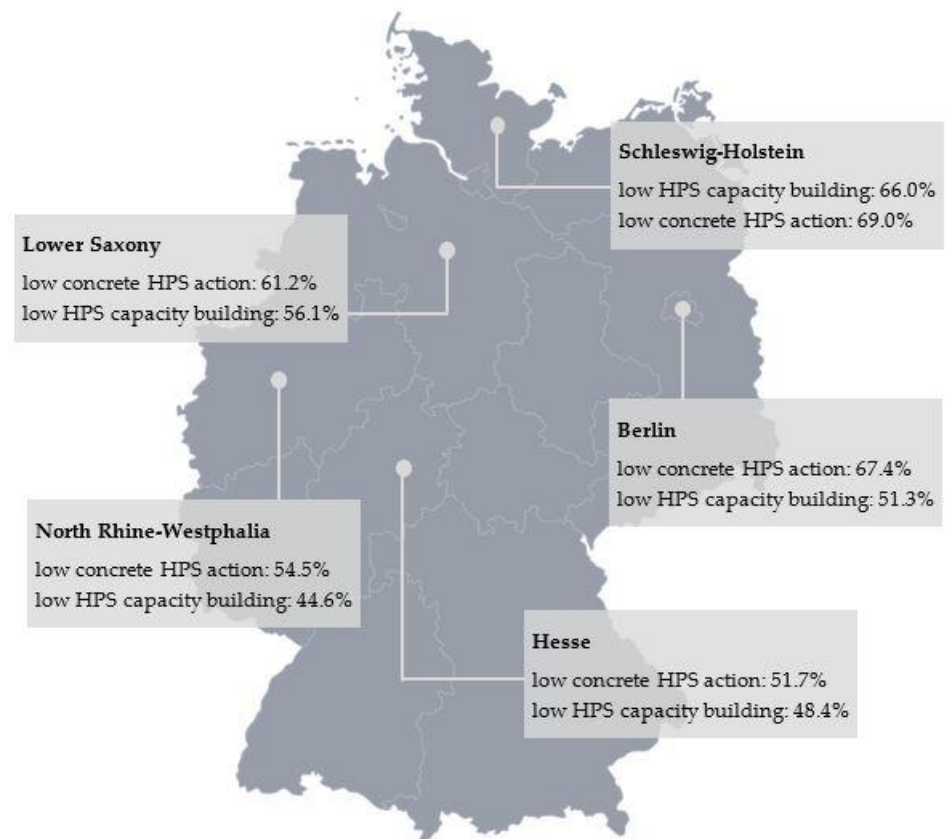

**Figure S1.** Low HPS implementation stratified by federal state.
